# Supplementary material for: Assessment of local Seismic records and Spatiotemporal distribution Study in the Comoros Archipelago between 2017 and 2021
Source: Research Square preprint supplement (doi:10.21203/rs.3.rs-8756738/v1), 2026-02-19
Supplement: Supplementary file 1 [file b65d107f757bbfd6cf57683b.xlsx]

## Sheet: Table-1-2017-Md-Events
								Original data
	Table 1: 2017 Md magnitudes						number	2017	Magnitude (Md)	Longitude	Latitude
	Number	2017	Magnitude (Md)
	1	20171210	3.33759				1	20171210	3.33759	42.165	-11.9777
	2	20171211	2.04711				2	20171211	2.04711	43.1522	-11.7382
	3	20171213	1.43953				3	20171213	1.43953	43.4333	-11.763
	4	20171219	2.38806				4	20171219	2.38806	43.625	-11.8243
	5	20171220	1.69078				5	20171220	1.69078	43.1323	-11.507
	6	20171223	1.91942				6	20171223	1.91942	43.6705	-11.9414
	used for fig.3

## Sheet: Table-2-2018-Md-Events
		Table 2: 2018 Md magnitudes						Original data
		Num	2018	Magnitude (Md)			Num	2018	Magnitude (Md)	Longitude	Latitude
		1	20180105	2.43524
		2	20180215	2.15279			1	20180105	2.43524	42.8004	-11.6448
		3	20180222	2.73449			2	20180215	2.15279	43.3312	-11.9132
		4	20180223	2.11094			3	20180222	2.73449	43.5845	-11.87
		5	20180227	2.65182			4	20180223	2.11094	43.5506	-11.8081
		6	20180301	1.8521			5	20180227	2.65182	43.4839	-11.4394
		7	20180418	1.86893			6	20180301	1.8521	43.1724	-11.738
		8	20180425	2.5685			7	20180418	1.86893	43.345	-11.7235
		9	20180511	3.68215			8	20180425	2.5685	42.5059	-11.7063
		10	20180513	4.25997			9	20180511	3.68215	43.5824	-13.8567
		11	20180516	4.11806			10	20180513	4.25997	45.2968	-12.9207
		12	20180516	4.37151			11	20180516	4.11806	45.1545	-13.0404
		13	20180517	3.67464			12	20180516	4.37151	45.5035	-11.0238
		14	20180520	4.12228			13	20180517	3.67464	45.2921	-12.7593
		15	20180522	4.43921			14	20180520	4.12228	45.6243	-12.7863
		16	20180523	4.53844			15	20180522	4.43921	45.1916	-13.0164
		17	20180524	4.51774			16	20180523	4.53844	45.3754	-12.6951
		18	20180529	3.96226			17	20180524	4.51774	45.4231	-12.8993
		19	20180530	3.95693			18	20180529	3.96226	45.5347	-12.791
		20	20180530	3.82732			19	20180530	3.95693	45.3848	-12.9266
		21	20180530	4.8885			20	20180530	3.82732	45.4318	-12.9166
		22	20180530	3.60535			21	20180530	4.8885	45.8121	-12.783
		23	20180531	4.55311			22	20180530	3.60535	45.3661	-12.9587
		24	20180603	4.25052			23	20180531	4.55311	45.8026	-12.7302
		25	20180603	4.64711			24	20180603	4.25052	45.5893	-12.8413
		26	20180603	2.99018			25	20180603	4.64711	45.6656	-12.8136
		27	20180603	4.2775			26	20180603	2.99018	43.5912	-11.078
		28	20180603	4.55329			27	20180603	4.2775	45.3823	-13.0941
		29	20180603	4.33136			28	20180603	4.55329	45.3774	-12.9809
		30	20180604	3.54437			29	20180603	4.33136	45.3532	-12.9852
		31	20180604	3.7902			30	20180604	3.54437	45.3605	-12.8199
		32	20180604	4.45533			31	20180604	3.7902	45.3174	-12.9139
		33	20180604	4.76977			32	20180604	4.45533	45.5869	-12.8384
		34	20180606	4.62625			33	20180604	4.76977	45.6165	-12.8255
		35	20180607	3.39427			34	20180606	4.62625	45.399	-13.0806
		36	20180608	4.70685			35	20180607	3.39427	41.4036	-11.3513
		37	20180608	4.6586			36	20180608	4.70685	45.6085	-12.8094
		38	20180608	4.78231			37	20180608	4.6586	45.5481	-12.8615
		39	20180609	4.53478			38	20180608	4.78231	45.3999	-12.901
		40	20180612	4.88303			39	20180609	4.53478	45.5791	-12.9223
		41	20180616	4.78972			40	20180612	4.88303	45.5631	-13.0009
		42	20180617	4.16917			41	20180616	4.78972	45.514	-12.8538
		43	20180618	4.86267			42	20180617	4.16917	45.4194	-12.8453
		44	20180619	4.70086			43	20180618	4.86267	45.6182	-12.9023
		45	20180619	4.37417			44	20180619	4.70086	45.6554	-12.8613
		46	20180621	3.97251			45	20180619	4.37417	45.6173	-12.8953
		47	20180624	2.6912			46	20180621	3.97251	45.2575	-13.1821
		48	20180625	4.87056			47	20180624	2.6912	43.5633	-11.8384
		49	20180627	4.95029			48	20180625	4.87056	45.642	-12.9144
		50	20180703	3.24001			49	20180627	4.95029	45.4671	-13.083
		51	20180703	4.02294			50	20180703	3.24001	43.1839	-12.7417
		52	20180705	4.2379			51	20180703	4.02294	45.2836	-12.888
		53	20180717	3.06121			52	20180705	4.2379	45.3243	-12.9552
		54	20180731	4.29199			53	20180717	3.06121	45.3629	-12.4314
		55	20180731	1.96342			54	20180731	4.29199	45.3822	-12.8721
		56	20180801	3.56602			55	20180731	1.96342	43.325	-11.7159
		57	20180803	3.49548			56	20180801	3.56602	45.2799	-12.3936
		58	20180803	2.38114			57	20180803	3.49548	45.3534	-12.8847
		59	20180805	3.05027			58	20180803	2.38114	43.5596	-12.1787
		60	20180805	3.54117			59	20180805	3.05027	43.5244	-12.0499
		61	20180806	3.03466			60	20180805	3.54117	45.3866	-12.4994
		62	20180814	2.3447			61	20180806	3.03466	45.3761	-12.5062
		63	20180821	4.84746			62	20180814	2.3447	43.1613	-12.031
		64	20180824	3.08402			63	20180821	4.84746	41.4427	-11.2611
		65	20180826	2.51431			64	20180824	3.08402	42.1776	-11.0688
		66	20180827	1.96208			65	20180826	2.51431	43.4586	-11.8735
		67	20180827	4.09799			66	20180827	1.96208	43.2103	-11.8547
		68	20180828	2.27099			67	20180827	4.09799	45.2826	-12.596
		69	20180902	3.88198			68	20180828	2.27099	43.5874	-12.0527
		70	20180903	3.80902			69	20180902	3.88198	45.395	-12.7783
		71	20180909	3.97435			70	20180903	3.80902	45.5753	-12.7548
		72	20180909	3.94201			71	20180909	3.97435	45.4192	-12.4685
		73	20180909	3.49423			72	20180909	3.94201	41.5446	-12.1792
		74	20181008	1.76466			73	20180909	3.49423	42.609	-11.8131
		75	20181009	3.98516			74	20181008	1.76466	43.2582	-11.7412
		76	20181016	4.50046			75	20181009	3.98516	45.3804	-12.8594
		77	20181021	2.50954			76	20181016	4.50046	45.3428	-12.7718
		78	20181024	3.5698			77	20181021	2.50954	43.4023	-11.716
		79	20181027	2.27453			78	20181024	3.5698	45.2838	-12.372
		80	20181103	3.73165			79	20181027	2.27453	43.4236	-11.8402
		81	20181106	3.51941			80	20181103	3.73165	45.3044	-12.711
		82	20181107	4.36916			81	20181106	3.51941	42.4552	-10.5044
		83	20181113	3.68156			82	20181107	4.36916	45.5552	-12.3147
		84	20181114	3.99235			83	20181113	3.68156	44.3704	-10.3454
		85	20181114	4.04302			84	20181114	3.99235	45.5523	-12.3222
		86	20181119	4.16781			85	20181114	4.04302	45.594	-12.3203
		87	20181120	4.08049			86	20181119	4.16781	44.9351	-12.8397
		88	20181120	2.93657			87	20181120	4.08049	42.5672	-12.6731
		89	20181120	3.42744			88	20181120	2.93657	42.5397	-12.3639
		90	20181120	4.72644			89	20181120	3.42744	41.9848	-12.7088
		91	20181120	3.6387			90	20181120	4.72644	42.1584	-13.1356
		92	20181120	2.14158			91	20181120	3.6387	41.7571	-12.4152
		93	20181121	3.29511			92	20181120	2.14158	43.0198	-11.6147
		94	20181121	3.36244			93	20181121	3.29511	43.8778	-13.058
		95	20181127	4.80031			94	20181121	3.36244	42.2268	-12.273
		96	20181128	3.61545			95	20181127	4.80031	45.3564	-12.7353
		97	20181129	4.66641			96	20181128	3.61545	45.3795	-12.7501
		98	20181208	3.66659			97	20181129	4.66641	45.3712	-12.7465
		99	20181209	3.79581			98	20181208	3.66659	45.2737	-12.3735
		100	20181210	4.23234			99	20181209	3.79581	44.9505	-13.0373
		101	20181210	3.55816			100	20181210	4.23234	45.2752	-12.5432
		102	20181211	4.0989			101	20181210	3.55816	45.1951	-12.4174
		103	20181211	3.28503			102	20181211	4.0989	45.6124	-12.3238
		104	20181211	3.25258			103	20181211	3.28503	45.3092	-12.3968
		Used for Fig.4					104	20181211	3.25258	45.2166	-12.4452

## Sheet: Table-3-2019-Md-Events
	Table 3: 2019 Md magnitudes.									Original data
	Number	2019	Magnitude (Md)						Num	2019	Magnitude (Md)	Longitude	Latitude
	1	20190405	3.8215
	2	20190429	3.08929						1	20190405	3.8215	45.2374	-12.7316
	3	20190502	1.27828						2	20190429	3.08929	41.7156	-10.6237
	4	20190502	1.27529						3	20190502	1.27828	43.2805	-11.8313
	5	20190502	1.56205						4	20190502	1.27529	43.2783	-11.8203
	6	20190509	2.87321						5	20190502	1.56205	43.2752	-11.8232
	7	20190511	1.45223						6	20190509	2.87321	41.7668	-12.1374
	8	20190520	1.69497						7	20190511	1.45223	43.3127	-11.8317
	9	20190520	2.07342						8	20190520	1.69497	43.345	-11.7295
	10	20190521	4.73662						9	20190520	2.07342	43.4392	-11.744
	11	20190522	3.90028						10	20190521	4.73662	41.5251	-14.3675
	12	20190522	4.02495						11	20190522	3.90028	41.0103	-13.8552
	13	20190523	2.81905						12	20190522	4.02495	46.1291	-12.4068
	14	20190524	2.76105						13	20190523	2.81905	42.4234	-12.2207
	15	20190528	3.6879						14	20190524	2.76105	42.556	-12.3367
	16	20190529	2.58023						15	20190528	3.6879	41.639	-10.974
	17	20190927	2.27026						16	20190529	2.58023	43.8095	-12.0341
	18	20191008	3.73036						17	20190927	2.27026	43.3748	-11.073
	19	20191009	2.71299						18	20191008	3.73036	42.32	-11.762
	20	20191013	3.00968						19	20191009	2.71299	42.5779	-12.2782
	21	20191013	2.40934						20	20191013	3.00968	42.0407	-10.9922
	22	20191014	2.14227						21	20191013	2.40934	43.345	-11.7468
	23	20191015	2.41162						22	20191014	2.14227	43.2839	-11.7045
	24	20191015	3.37353						23	20191015	2.41162	43.1126	-12.054
	25	20191019	2.93126						24	20191015	3.37353	43.5762	-12.721
	26	20191021	3.52442						25	20191019	2.93126	43.5211	-12.0638
	27	20191023	2.60134						26	20191021	3.52442	43.2985	-11.6875
	28	20191023	3.97951						27	20191023	2.60134	43.0815	-11.4548
	29	20191026	2.76606						28	20191023	3.97951	44.9332	-12.8782
	30	20191122	1.47412						29	20191026	2.76606	43.0036	-12.4408
	31	20191123	3.43128						30	20191122	1.47412	43.0957	-11.9054
	32	20191124	4.09682						31	20191123	3.43128	42.1516	-13.446
	33	20191127	1.93917						32	20191124	4.09682	45.3998	-12.676
	34	20191202	4.00063						33	20191127	1.93917	43.3257	-11.9191
	Used for Fig.5								34	20191202	4.00063	45.1701	-12.8543

## Sheet: Table-4-2020-Md-Events
			Table 4: 2020 Md magnitudes					Original data
							Num	2020	Magnitude (Md)	Longitude	Latitude
			Number	2020	Magnitude (Md)
			1	20200321	4.66908		1	20200321	4.66908	44.7245	-12.3525
			2	20200327	2.07871		2	20200327	2.07871	43.2595	-11.8
			3	20200328	2.13305		3	20200328	2.13305	43.2667	-11.7723
			4	20200504	2.86932		4	20200504	2.86932	43.8021	-12.2669
			5	20200526	2.09106		5	20200526	2.09106	43.1723	-11.6353
			6	20200527	2.27662		6	20200527	2.27662	43.429	-11.8356
			7	20200606	3.06849		7	20200606	3.06849	43.2697	-11.3882
			8	20200608	2.55635		8	20200608	2.55635	43.4402	-12.0027
			9	20200611	3.84978		9	20200611	3.84978	43.2563	-11.8905
			10	20200611	2.34743		10	20200611	2.34743	43.3185	-11.9173
			11	20200616	1.69315		11	20200616	1.69315	43.345	-11.975
			12	20200704	4.15314		12	20200704	4.15314	41.6691	-11.6922
			13	20200710	2.13288		13	20200710	2.13288	43.4622	-11.929
			14	20200908	3.181		14	20200908	3.181	45.2838	-12.8645
			15	20200921	1.69748		15	20200921	1.69748	43.2756	-11.77
			16	20200925	4.17402		16	20200925	4.17402	45.2098	-13.3756
			17	20200925	3.93838		17	20200925	3.93838	45.3127	-13.5775
			18	20200926	3.10648		18	20200926	3.10648	41.5653	-12.2725
			19	20201001	2.19612		19	20201001	2.19612	43.2168	-11.687
			20	20201009	2.85333		20	20201009	2.85333	43.5613	-11.8728
			21	20201010	2.26525		21	20201010	2.26525	43.2761	-11.7344
			22	20201012	2.77236		22	20201012	2.77236	43.5993	-11.87
			23	20201016	2.03195		23	20201016	2.03195	43.3125	-11.8758
			24	20201019	1.68213		24	20201019	1.68213	43.3395	-11.707
			25	20201019	1.41011		25	20201019	1.41011	43.2247	-11.7538
			26	20201019	2.0452		26	20201019	2.0452	43.2047	-11.751
			27	20201103	2.14936		27	20201103	2.14936	43.3733	-11.8393
			28	20201107	2.87838		28	20201107	2.87838	43.6172	-12.067
			29	20201108	1.89855		29	20201108	1.89855	43.3268	-11.6801
			30	20201110	4.45985		30	20201110	4.45985	45.2838	-12.9645
			31	20201111	2.13177		31	20201111	2.13177	43.7213	-11.8122
			32	20201111	1.78768		32	20201111	1.78768	43.5304	-12.0107
			33	20201112	3.71778		33	20201112	3.71778	41.7549	-10.8909
			34	20201115	1.93581		34	20201115	1.93581	43.7726	-12.0018
			35	20201116	2.05276		35	20201116	2.05276	43.5345	-11.8083
			36	20201117	1.3889		36	20201117	1.3889	43.2493	-11.7467
			37	20201119	2.45603		37	20201119	2.45603	43.6402	-11.8382
			38	20201124	2.85465		38	20201124	2.85465	43.4116	-12.2055
			Used for Fig.6

## Sheet: Table-5-2021-Md-Events
									Original data
		Table 5: 2021 Md magnitudes						Number	2021	Magnitude (Md)	Longitude	Latitude
		Number	2021	Magnitude (Md)
		1	20210109	1.97576				1	20210109	1.97576	43.17	-11.9494
		2	20210115	1.53384				2	20210115	1.53384	43.3064	-11.7389
		3	20210116	2.68938				3	20210116	2.68938	43.0781	-11.9544
		4	20210124	3.36475				4	20210124	3.36475	42.328	-11.4488
		5	20210303	4.43864				5	20210303	4.43864	45.4037	-12.729
		6	20210304	2.51106				6	20210304	2.51106	43.1367	-11.3962
		7	20210305	3.09207				7	20210305	3.09207	41.446	-11.805
		8	20210306	2.80782				8	20210306	2.80782	43.8657	-12.2271
		9	20210308	2.8304				9	20210308	2.8304	43.8718	-12.2005
		10	20210309	3.99037				10	20210309	3.99037	43.8719	-12.196
		11	20210310	2.25543				11	20210310	2.25543	43.8879	-12.2215
		12	20210311	2.46548				12	20210311	2.46548	43.415	-11.6987
		13	20210319	3.52053				13	20210319	3.52053	44.2172	-11.9764
		14	20210321	1.30345				14	20210321	1.30345	43.2965	-11.7409
		15	20210322	1.52943				15	20210322	1.52943	43.3979	-11.8199
		16	20210422	3.04666				16	20210422	3.04666	42.9912	-11.7585
		17	20210425	2.32202				17	20210425	2.32202	43.2941	-11.763
		18	20210426	1.77408				18	20210426	1.77408	43.2888	-11.7595
		19	20210426	3.29193				19	20210426	3.29193	42.7172	-11.4092
		20	20210427	2.26106				20	20210427	2.26106	43.4857	-11.8634
		21	20210518	2.77803				21	20210518	2.77803	43.7266	-11.8102
		22	20210524	2.50145				22	20210524	2.50145	43.1704	-11.5274
		23	20210808	2.89481				23	20210808	2.89481	43.648	-11.8604
		24	20210809	3.04838				24	20210809	3.04838	43.3538	-13.2073
		25	20210811	1.39381				25	20210811	1.39381	43.3872	-11.7058
		26	20210820	4.82024				26	20210820	4.82024	41.8235	-15.0362
		27	20210822	1.80776				27	20210822	1.80776	43.345	-11.7032
		28	20210825	3.1116				28	20210825	3.1116	45.5112	-12.9259
		29	20210825	2.41777				29	20210825	2.41777	43.39	-12.4163
		30	20210825	3.59301				30	20210825	3.59301	42.7703	-9.89146
		31	20210826	3.88941				31	20210826	3.88941	47.157	-13.5305
		32	20210830	2.86257				32	20210830	2.86257	43.2227	-11.2996
		33	20210901	3.35446				33	20210901	3.35446	45.4109	-12.9037
		34	20210904	2.0767				34	20210904	2.0767	43.5697	-11.8951
		35	20210904	2.39985				35	20210904	2.39985	43.6254	-12.1302
		36	20210905	3.2513				36	20210905	3.2513	44.2553	-11.9143
		37	20210908	1.79736				37	20210908	1.79736	43.6308	-11.756
		38	20210920	3.67581				38	20210920	3.67581	42.9634	-9.77995
		39	20211027	1.01279				39	20211027	1.01279	43.3627	-11.7335
		40	20211028	1.64754				40	20211028	1.64754	43.3617	-11.7363
		41	20211029	1.53568				41	20211029	1.53568	43.3625	-11.737
		42	20211029	1.71585				42	20211029	1.71585	43.364	-11.7352
		43	20211117	2.4367				43	20211117	2.4367	43.2628	-11.7795
		44	20211117	1.75774				44	20211117	1.75774	43.2275	-11.7138
		45	20211117	1.49025				45	20211117	1.49025	43.2595	-11.7172
		46	20211117	1.59107				46	20211117	1.59107	43.2463	-11.7175
		47	20211117	1.36032				47	20211117	1.36032	43.2532	-11.7127
		48	20211118	1.81947				48	20211118	1.81947	43.257	-11.7225
		49	20211119	1.77992				49	20211119	1.77992	43.2525	-11.715
		50	20211120	1.3315				50	20211120	1.3315	43.2513	-11.7183
		51	20211121	1.25353				51	20211121	1.25353	43.3668	-11.7375
		52	20211124	0.647905				52	20211124	0.647905	43.3472	-11.7242
		Used for Fig.7

## Sheet: Md-to-Mw Converted tables
										Derived from works by Hanks and Kanamori (1979)	Akkar and Bommer (Citation 2010)
					Num	2018	Magnitude (Md)	Longitude	Latitude	Magnitude (Mw)-(H-N)	Magnitude (Mw)-(A-B)
					1	20180105	2.43524	42.8004	-11.6448	2.99737	3.23953
					2	20180215	2.15279	43.3312	-11.9132	2.74598	3.02373
					3	20180222	2.73449	43.5845	-11.87	3.26369	3.46815
					4	20180223	2.11094	43.5506	-11.8081	2.70873	2.99175
					5	20180227	2.65182	43.4839	-11.4394	3.19012	3.40499
					6	20180301	1.8521	43.1724	-11.738	2.47837	2.794
					7	20180418	1.86893	43.345	-11.7235	2.49335	2.80687
					8	20180425	2.5685	42.5059	-11.7063	3.11597	3.34134
					9	20180511	3.68215	43.5824	-13.8567	4.10711	4.19216
					10	20180513	4.25997	45.2968	-12.9207	4.62137	4.63361
					11	20180516	4.11806	45.1545	-13.0404	4.49508	4.5252
					12	20180516	4.37151	45.5035	-11.0238	4.72064	4.71883
					13	20180517	3.67464	45.2921	-12.7593	4.10043	4.18643
					14	20180520	4.12228	45.6243	-12.7863	4.49883	4.52842
					15	20180522	4.43921	45.1916	-13.0164	4.7809	4.77056
					16	20180523	4.53844	45.3754	-12.6951	4.86921	4.84637
					17	20180524	4.51774	45.4231	-12.8993	4.85079	4.83055
					18	20180529	3.96226	45.5347	-12.791	4.35641	4.40616
					19	20180530	3.95693	45.3848	-12.9266	4.35167	4.4021
					20	20180530	3.82732	45.4318	-12.9166	4.23631	4.30307
					21	20180530	4.8885	45.8121	-12.783	5.18076	5.11381
					22	20180530	3.60535	45.3661	-12.9587	4.03877	4.13349
					23	20180531	4.55311	45.8026	-12.7302	4.88227	4.85758
					24	20180603	4.25052	45.5893	-12.8413	4.61296	4.6264
					25	20180603	4.64711	45.6656	-12.8136	4.96593	4.92939
					26	20180603	2.99018	43.5912	-11.078	3.49126	3.66349
					27	20180603	4.2775	45.3823	-13.0941	4.63698	4.64701
					28	20180603	4.55329	45.3774	-12.9809	4.88243	4.85771
					29	20180603	4.33136	45.3532	-12.9852	4.68491	4.68816
					30	20180604	3.54437	45.3605	-12.8199	3.98449	4.0869
					31	20180604	3.7902	45.3174	-12.9139	4.20328	4.27471
					32	20180604	4.45533	45.5869	-12.8384	4.79524	4.78287
					33	20180604	4.76977	45.6165	-12.8255	5.07509	5.0231
					34	20180606	4.62625	45.399	-13.0806	4.94737	4.91346
					35	20180607	3.39427	41.4036	-11.3513	3.8509	3.97222
					36	20180608	4.70685	45.6085	-12.8094	5.0191	4.97503
					37	20180608	4.6586	45.5481	-12.8615	4.97615	4.93817
					38	20180608	4.78231	45.3999	-12.901	5.08625	5.03268
					39	20180609	4.53478	45.5791	-12.9223	4.86596	4.84357
					40	20180612	4.88303	45.5631	-13.0009	5.1759	5.10964
					41	20180616	4.78972	45.514	-12.8538	5.09285	5.03835
					42	20180617	4.16917	45.4194	-12.8453	4.54056	4.56424
					43	20180618	4.86267	45.6182	-12.9023	5.15778	5.09408
					44	20180619	4.70086	45.6554	-12.8613	5.01376	4.97045
					45	20180619	4.37417	45.6173	-12.8953	4.72301	4.72086
					46	20180621	3.97251	45.2575	-13.1821	4.36553	4.414
					47	20180624	2.6912	43.5633	-11.8384	3.22517	3.43508
					48	20180625	4.87056	45.642	-12.9144	5.16479	5.1001
					49	20180627	4.95029	45.4671	-13.083	5.23576	5.16102
					50	20180703	3.24001	43.1839	-12.7417	3.71361	3.85437
					51	20180703	4.02294	45.2836	-12.888	4.41042	4.45253
					52	20180705	4.2379	45.3243	-12.9552	4.60173	4.61676
					53	20180717	3.06121	45.3629	-12.4314	3.55448	3.71777
					54	20180731	4.29199	45.3822	-12.8721	4.64987	4.65808
					55	20180731	1.96342	43.325	-11.7159	2.57744	2.87905
					56	20180801	3.56602	45.2799	-12.3936	4.00376	4.10344
					57	20180803	3.49548	45.3534	-12.8847	3.94098	4.04955
					58	20180803	2.38114	43.5596	-12.1787	2.94921	3.19819
					59	20180805	3.05027	43.5244	-12.0499	3.54474	3.70941
					60	20180805	3.54117	45.3866	-12.4994	3.98164	4.08445
					61	20180806	3.03466	45.3761	-12.5062	3.53085	3.69748
					62	20180814	2.3447	43.1613	-12.031	2.91678	3.17035
					63	20180821	4.84746	41.4427	-11.2611	5.14424	5.08246
					64	20180824	3.08402	42.1776	-11.0688	3.57478	3.73519
					65	20180826	2.51431	43.4586	-11.8735	3.06773	3.29993
					66	20180827	1.96208	43.2103	-11.8547	2.57626	2.87803
					67	20180827	4.09799	45.2826	-12.596	4.47721	4.50986
					68	20180828	2.27099	43.5874	-12.0527	2.85118	3.11404
					69	20180902	3.88198	45.395	-12.7783	4.28496	4.34483
					70	20180903	3.80902	45.5753	-12.7548	4.22003	4.28909
					71	20180909	3.97435	45.4192	-12.4685	4.36717	4.4154
					72	20180909	3.94201	41.5446	-12.1792	4.33839	4.39069
					73	20180909	3.49423	42.609	-11.8131	3.93986	4.04859
					74	20181008	1.76466	43.2582	-11.7412	2.40055	2.7272
					75	20181009	3.98516	45.3804	-12.8594	4.37679	4.42366
					76	20181016	4.50046	45.3428	-12.7718	4.83541	4.81735
					77	20181021	2.50954	43.4023	-11.716	3.06349	3.29629
					78	20181024	3.5698	45.2838	-12.372	4.00712	4.10633
					79	20181027	2.27453	43.4236	-11.8402	2.85433	3.11674
					80	20181103	3.73165	45.3044	-12.711	4.15117	4.22998
					81	20181106	3.51941	42.4552	-10.5044	3.96228	4.06783
					82	20181107	4.36916	45.5552	-12.3147	4.71855	4.71704
					83	20181113	3.68156	44.3704	-10.3454	4.10659	4.19171
					84	20181114	3.99235	45.5523	-12.3222	4.38319	4.42916
					85	20181114	4.04302	45.594	-12.3203	4.42829	4.46787
					86	20181119	4.16781	44.9351	-12.8397	4.53935	4.56321
					87	20181120	4.08049	42.5672	-12.6731	4.46163	4.49649
					88	20181120	2.93657	42.5397	-12.3639	3.44355	3.62254
					89	20181120	3.42744	41.9848	-12.7088	3.88043	3.99757
					90	20181120	4.72644	42.1584	-13.1356	5.03653	4.99
					91	20181120	3.6387	41.7571	-12.4152	4.06844	4.15897
					92	20181120	2.14158	43.0198	-11.6147	2.73601	3.01517
					93	20181121	3.29511	43.8778	-13.058	3.76265	3.89646
					94	20181121	3.36244	42.2268	-12.273	3.82257	3.9479
					95	20181127	4.80031	45.3564	-12.7353	5.10228	5.04644
					96	20181128	3.61545	45.3795	-12.7501	4.04775	4.1412
					97	20181129	4.66641	45.3712	-12.7465	4.98311	4.94414
					98	20181208	3.66659	45.2737	-12.3735	4.09326	4.18027
					99	20181209	3.79581	44.9505	-13.0373	4.20827	4.279
					100	20181210	4.23234	45.2752	-12.5432	4.59678	4.61251
					101	20181210	3.55816	45.1951	-12.4174	3.99676	4.09744
					102	20181211	4.0989	45.6124	-12.3238	4.47802	4.51056
					103	20181211	3.28503	45.3092	-12.3968	3.75368	3.88876
					104	20181211	3.25258	45.2166	-12.4452	3.72479	3.86397

## Sheet: N=62-Events
62
										#	Date	Magnitude (Md)
										1	20180513	4.26
										2	20180516	4.118
										3	20180516	4.372
										4	20180520	4.122
										5	20180522	4.439
										6	20180523	4.538
										7	20180524	4.518
										8	20180530	4.888
										9	20180531	4.553
										10	20180603	4.251
										11	20180603	4.647
										12	20180603	4.278
										13	20180603	4.553
			When calculating the Sum of 62 magnitudes:							14	20180603	4.331
			∑M_i= 4.260+4.118+4.372+…+4.682 = 282.223							15	20180604	4.455
			∑M_i = 282.223 – (4.553+4.682) = 272.011 (duplication removed)							16	20180604	4.77
										17	20180606	4.626
										18	20180608	4.707
										19	20180608	4.659
										20	20180608	4.782
										21	20180609	4.535
										22	20180612	4.883
										23	20180616	4.79
										24	20180617	4.169
										25	20180618	4.863
										26	20180619	4.701
										27	20180619	4.374
										28	20180625	4.871
										29	20180627	4.95	Max.Md
										30	20180705	4.238
										31	20180731	4.292
										32	20180806	4.098
										33	20180821	4.847
										34	20181016	4.5
										35	20181107	4.369
										36	20181114	4.043
										37	20181119	4.168
										38	20181120	4.08
										39	20181120	4.726
										40	20181127	4.8
										41	20181128	4.666
										42	20181210	4.232
										43	20181211	4.099
										44	20180511	4.682
										45	20180517	4.675
										46	20180529	4.962
										47	20180530	4.957
										48	20180530	4.827
										49	20180530	4.605
										50	20180604	4.79
										51	20180607	4.394
										52	20180621	4.973
										53	20180703	4.24
										54	20180703	4.023
										55	20180801	4.566
										56	20180803	4.495
										57	20180805	4.541
										58	20180902	4.882
										59	20180903	4.809
										60	20180909	4.974
										61	20181009	4.985
										62	20181113	4.682
